# Supplementary material
Source: PubMed Central journal article supplement (PMC1838490)
Supplement: pnas_0609746104_11.pdf [file pnas_0609746104_11.pdf]

**Table 1: Loci with COACD score smaller than -5**

| chrom                               | Coordinate | score    | #CpG in win (human or chimp) | #div CpGs | Nearby feature(s) | type   |
|-------------------------------------|------------|----------|------------------------------|-----------|-------------------|--------|
| <b>developmental TFs (HOX etal)</b> |            |          |                              |           |                   |        |
| 1                                   | 119336976  | -6.88477 | 458                          | 36        | TBX15             | dev_tf |
| 1                                   | 168905488  | -6.04653 | 233                          | 26        | PRRX1             | dev_tf |
| 1                                   | 75365327   | -5.78384 | 326                          | 39        | LHX8              | dev_tf |
| 1                                   | 162803238  | -5.33431 | 177                          | 26        | PBX1              | dev_tf |
| 1                                   | 87571591   | -5.17346 | 278                          | 32        | LMO4              | dev_tf |
| 2                                   | 171387611  | -6.73039 | 360                          | 40        | Sp5 - GAD5        | dev_tf |
| 2                                   | 176657942  | -6.61059 | 561                          | 53        | HOXD13            | dev_tf |
| 2                                   | 66517403   | -6.4513  | 444                          | 61        | MEIS1 5'          | dev_tf |
| 2                                   | 66658031   | -6.43498 | 340                          | 28        | MEIS1 3'          | dev_tf |
| 2                                   | 222876607  | -6.18034 | 454                          | 45        | PAX3              | dev_tf |
| 2                                   | 176729384  | -6.16437 | 398                          | 44        | HOXD3,HOXD4       | dev_tf |
| 2                                   | 161987141  | -6.07144 | 352                          | 32        | TBR1              | dev_tf |
| 2                                   | 172667906  | -5.81917 | 375                          | 29        | DLX1,DLX2         | dev_tf |
| 2                                   | 63139558   | -5.78659 | 314                          | 17        | OTX1              | dev_tf |
| 2                                   | 45017261   | -5.66729 | 594                          | 70        | SIX3              | dev_tf |
| 2                                   | 8742806    | -5.5551  | 234                          | 24        | ID2               | dev_tf |
| 2                                   | 182248754  | -5.49989 | 242                          | 29        | NEUROD1           | dev_tf |
| 2                                   | 119324960  | -5.36754 | 472                          | 48        | EN1               | dev_tf |
| 2                                   | 236744600  | -5.01638 | 603                          | 58        | GBX2              | dev_tf |
| 3                                   | 182906256  | -8.35481 | 316                          | 22        | SOX2              | dev_tf |
| 3                                   | 138971006  | -7.91837 | 430                          | 43        | SOX14             | dev_tf |
| 3                                   | 27738831   | -6.95061 | 431                          | 54        | TBR2              | dev_tf |
| 3                                   | 159303138  | -6.27636 | 348                          | 40        | SHOX2             | dev_tf |
| 3                                   | 148617275  | -6.13715 | 313                          | 27        | ZIC4/ZIC1         | dev_tf |
| 3                                   | 71716293   | -6.03882 | 261                          | 23        | FOXP1             | dev_tf |
| 4                                   | 13150067   | -6.45208 | 438                          | 26        | BAPX1             | dev_tf |
| 4                                   | 111762039  | -6.40696 | 508                          | 26        | PITX2 I           | dev_tf |
| 4                                   | 174682921  | -5.99611 | 479                          | 38        | HAND2             | dev_tf |
| 4                                   | 113657178  | -5.41874 | 406                          | 25        | NEUROG2           | dev_tf |
| 5                                   | 2803643    | -7.3091  | 551                          | 49        | IRX2              | dev_tf |
| 5                                   | 3653709    | -5.93672 | 721                          | 70        | IRX1              | dev_tf |
| 5                                   | 50712659   | -5.81992 | 291                          | 19        | ISL1              | dev_tf |
| 5                                   | 172596333  | -5.49233 | 502                          | 47        | NKX2-5            | dev_tf |
| 5                                   | 88212189   | -5.36978 | 240                          | 21        | MEF2C             | dev_tf |
| 5                                   | 76968010   | -5.19655 | 503                          | 36        | OTP1              | dev_tf |
| 6                                   | 101017517  | -6.71015 | 599                          | 43        | SIM1              | dev_tf |
| 6                                   | 10489082   | -5.87776 | 333                          | 33        | TFAP2A            | dev_tf |
| 6                                   | 50892922   | -5.84412 | 181                          | 9         | TFAP2D            | dev_tf |
| 6                                   | 10518599   | -5.20202 | 448                          | 27        | TFAP2A 5'         | dev_tf |
| 7                                   | 19122309   | -7.8817  | 379                          | 32        | TWIST1            | dev_tf |
| 7                                   | 20797725   | -7.24523 | 330                          | 19        | Sp8               | dev_tf |
| 7                                   | 15685394   | -6.19151 | 190                          | 34        | MEOX2             | dev_tf |
| 7                                   | 96473907   | -5.71374 | 438                          | 27        | DLX5,6            | dev_tf |

|                    |           |          |     |    |                             |        |
|--------------------|-----------|----------|-----|----|-----------------------------|--------|
| 7                  | 27141576  | -5.57447 | 388 | 29 | HOXA3,4,5,6,7               | dev_tf |
| 7                  | 27170651  | -5.39596 | 446 | 22 | HOXA7,9,10,11               | dev_tf |
| 7                  | 26203761  | -5.25428 | 260 | 29 | CBX3                        | dev_tf |
| 8                  | 10627507  | -5.98331 | 368 | 27 | SOX7                        | dev_tf |
| 8                  | 55537041  | -5.65415 | 481 | 40 | SOX17                       | dev_tf |
| 8                  | 11581193  | -5.65121 | 355 | 40 | GATA4                       | dev_tf |
| 8                  | 100029302 | -5.61792 | 489 | 42 | OSR2                        | dev_tf |
| 9                  | 970893    | -5.93555 | 372 | 60 | DMRT1/DMRT3                 | dev_tf |
| 9                  | 126567224 | -5.10167 | 247 | 18 | NR6A1                       | dev_tf |
| 9                  | 16856432  | -5.09866 | 204 | 16 | BNC2                        | dev_tf |
| 10                 | 8119356   | -5.73821 | 397 | 39 | GATA3                       | dev_tf |
| 10                 | 22661746  | -5.73744 | 495 | 32 | PCGF4                       | dev_tf |
| 10                 | 63331070  | -5.60221 | 263 | 18 | ARID5B                      | dev_tf |
| 10                 | 3811051   | -5.03631 | 277 | 30 | KLF6                        | dev_tf |
| 10                 | 119291328 | -5.03343 | 656 | 46 | EMX2                        | dev_tf |
| 11                 | 31803099  | -5.57663 | 551 | 47 | PAX6                        | dev_tf |
| 11                 | 128059192 | -5.53507 | 405 | 35 | FLI1                        | dev_tf |
| 12                 | 113324205 | -7.40644 | 567 | 57 | TBX5                        | dev_tf |
| 12                 | 84192887  | -5.82405 | 273 | 26 | CART1                       | dev_tf |
| 12                 | 113611675 | -5.56024 | 487 | 42 | TBX3 5'                     | dev_tf |
| 12                 | 112394740 | -5.50134 | 506 | 34 | LHX5 5'                     | dev_tf |
| 12                 | 52639987  | -5.24136 | 542 | 31 | HOXC cluster                | dev_tf |
| 13                 | 99430683  | -7.38988 | 572 | 24 | ZIC2,ZIC5 5'                | dev_tf |
| 13                 | 27441801  | -6.03146 | 493 | 40 | CDX2 5'                     | dev_tf |
| 13                 | 78067006  | -5.63706 | 405 | 34 | POU4F1 3'                   | dev_tf |
| 14                 | 28303240  | -7.69853 | 364 | 15 | FOXP1B 5'                   | dev_tf |
| 14                 | 60179673  | -6.58143 | 453 | 20 | SIX1 3'                     | dev_tf |
| 14                 | 56343846  | -6.50448 | 493 | 31 | OTX2 5'                     | dev_tf |
| 14                 | 37133640  | -6.21743 | 488 | 22 | FOXA1 5'                    | dev_tf |
| 14                 | 36053474  | -6.1007  | 427 | 30 | TITF1                       | dev_tf |
| 14                 | 60046806  | -5.49087 | 253 | 15 | SIX6 5'                     | dev_tf |
| 14                 | 94305377  | -5.47519 | 397 | 43 | GSC 5'                      | dev_tf |
| 15                 | 35181268  | -7.09827 | 440 | 32 | MEIS2 5'                    | dev_tf |
| 15                 | 50876017  | -6.96123 | 623 | 42 | ONECUT1 5'                  | dev_tf |
| 15                 | 65911359  | -6.66676 | 669 | 44 | LBXCOR1                     | dev_tf |
| 15                 | 34964433  | -5.81324 | 366 | 26 | MEIS2 3'                    | dev_tf |
| 15                 | 58082706  | -5.42268 | 511 | 37 | FOXB1 5'                    | dev_tf |
| 16                 | 85094795  | -6.70845 | 803 | 77 | FOXF1 5'                    | dev_tf |
| 16                 | 52881412  | -6.34919 | 483 | 26 | IRX3 5'                     | dev_tf |
| 16                 | 53522241  | -5.20665 | 642 | 41 | IRX5 5'                     | dev_tf |
| 17                 | 75385102  | -5.91136 | 720 | 42 | CBX2,CBX6                   | dev_tf |
| 17                 | 44042839  | -5.53167 | 481 | 35 | HOXB cluster                | dev_tf |
| 17                 | 44017359  | -5.33281 | 445 | 32 | HOXB cluster                | dev_tf |
| 18                 | 74844906  | -6.38472 | 375 | 37 | SALL3                       | dev_tf |
| 18                 | 53250307  | -5.78064 | 671 | 44 | ONECUT2 5'                  | dev_tf |
| 20                 | 21443473  | -6.16427 | 955 | 60 | NKX2-2 5'                   | dev_tf |
| 20                 | 21637585  | -6.13538 | 387 | 36 | PAX1 5'                     | dev_tf |
| 20                 | 38745424  | -5.2927  | 294 | 23 | MAFB                        | dev_tf |
| 21                 | 36995715  | -5.70847 | 896 | 86 | SIM2 5'                     | dev_tf |
| <b>Development</b> |           |          |     |    |                             |        |
| 1                  | 50663388  | -7.72729 | 467 | 25 | FAF1 3' (apoptosis), ELAVL4 | dev    |
| 1                  | 51208200  | -5.58166 | 215 | 19 | FAF1 5', CDKN2C             | dev    |

|                                                                                                          |           |          |     |    |                        |       |
|----------------------------------------------------------------------------------------------------------|-----------|----------|-----|----|------------------------|-------|
| 1                                                                                                        | 61324572  | -5.42575 | 224 | 29 | NFIA                   | dev   |
| 1                                                                                                        | 234618844 | -5.17094 | 98  | 3  | EDARADD                | dev   |
| 3                                                                                                        | 41220381  | -5.53443 | 150 | 16 | CTNNB1 5'              | dev   |
| 3                                                                                                        | 106562095 | -5.48372 | 198 | 17 | ALCAM 5'               | dev   |
| 3                                                                                                        | 55496448  | -5.35596 | 324 | 25 | WNT5A 5'               | dev   |
| 4                                                                                                        | 109312487 | -5.17707 | 402 | 16 | LEF1                   | dev   |
| 5                                                                                                        | 98131694  | -5.76908 | 319 | 29 | RGMB 5'                | dev   |
| 6                                                                                                        | 5950051   | -6.24962 | 503 | 54 | NRN1                   | dev   |
| 6                                                                                                        | 28892053  | -6.06239 | 256 | 27 | RFP                    | dev   |
| 7                                                                                                        | 8440970   | -6.25795 | 434 | 54 | NXPH1 5'               | dev   |
| 7                                                                                                        | 23475395  | -6.05691 | 360 | 14 | IGF2BP3 5'             | dev   |
| 8                                                                                                        | 6388419   | -5.23495 | 222 | 49 | MCPH1 5'               | dev   |
| 9                                                                                                        | 23822043  | -7.56706 | 290 | 26 | ELAVL2 5'              | dev   |
| 10                                                                                                       | 114876270 | -5.23886 | 296 | 37 | TCF7L2 I               | dev   |
| 11                                                                                                       | 20143486  | -6.41473 | 360 | 22 | NAV2 3'                | dev   |
| 13                                                                                                       | 34951508  | -5.56228 | 237 | 20 | MAB21L1                | dev   |
| 20                                                                                                       | 10364772  | -5.19744 | 152 | 16 | MKKS 5'                | dev   |
| <b>immune system</b>                                                                                     |           |          |     |    |                        |       |
| 4                                                                                                        | 54788502  | -5.8792  | 558 | 46 | PDGFRA 5'              | immun |
| 6                                                                                                        | 27314250  | -5.32107 | 165 | 19 | PRSS16 5'+3'           | immun |
| 10                                                                                                       | 15039098  | -5.91678 | 189 | 20 | DCLRE1C                | immun |
| <b>mir</b>                                                                                               |           |          |     |    |                        |       |
| 5                                                                                                        | 88012699  | -8.15804 | 535 | 29 | mir-9-2                | mir   |
| 8                                                                                                        | 65455366  | -6.39692 | 459 | 40 | mir-124a-2             | mir   |
| 8                                                                                                        | 9802911   | -5.0862  | 238 | 31 | mir-124a-1             | mir   |
| 11                                                                                                       | 43561147  | -5.44124 | 406 | 35 | mir-129-2              | mir   |
| <b>TF (not directly developmental)</b>                                                                   |           |          |     |    |                        |       |
| 5                                                                                                        | 180576377 | -5.30892 | 255 | 27 | TRIM41/TRIM7 5'        | tf    |
| 10                                                                                                       | 131565284 | -5.24988 | 377 | 40 | EBF3 I-5'              | tf    |
| 13                                                                                                       | 72522890  | -6.12934 | 131 | 8  | KLF5 5'                | tf    |
| 14                                                                                                       | 57829239  | -5.60871 | 196 | 19 | ARID4A 5'              | tf    |
| 19                                                                                                       | 12989465  | -6.79308 | 537 | 22 | NFIX 5'+I              | Tf    |
| <b>cancer</b>                                                                                            |           |          |     |    |                        |       |
| 2                                                                                                        | 111600887 | -5.71556 | 421 | 35 | BCL2L11 5'             | Canc  |
| 2                                                                                                        | 60645270  | -5.23771 | 219 | 29 | BCL11A 5'              | Canc  |
| 3                                                                                                        | 188945650 | -6.68775 | 313 | 37 | BCL6 5'                | Canc  |
| 10                                                                                                       | 21852373  | -6.51432 | 320 | 16 | MLLT10 5'              | Canc  |
| 22                                                                                                       | 26519184  | -5.0313  | 364 | 33 | MN1 5'                 | Canc  |
| <b>others</b>                                                                                            |           |          |     |    |                        |       |
| 6                                                                                                        | 75970064  | -5.96105 | 336 | 39 | COL12A1 5'             | O     |
| 6                                                                                                        | 26341307  | -5.26864 | 184 | 27 | Histone cluster        | O     |
| 11                                                                                                       | 95171729  | -5.04718 | 204 | 20 | CEP57 5'               | O     |
| 12                                                                                                       | 55363075  | -5.11613 | 159 | 10 | PTGES3 5'              | O     |
| 13                                                                                                       | 99964303  | -5.17624 | 322 | 57 | PCCA 3'                | O     |
| 19                                                                                                       | 752362    | -5.57254 | 576 | 49 | PTBP1 5'+I             | O     |
| <b>uncharacterized region or ORF/protein - some may be coding sequences missed by current annotation</b> |           |          |     |    |                        |       |
| 1                                                                                                        | 159694731 | -7.12734 | 880 | 75 | Large CGI              | U     |
| 1                                                                                                        | 215383135 | -5.18593 | 265 | 27 | Maybe ESRRG (far), CGI | U     |
| 2                                                                                                        | 104841937 | -7.07759 | 495 | 42 | CGI                    | U     |
| 2                                                                                                        | 174906646 | -6.49717 | 385 | 27 | FLJ46347 (CGI)         | U     |
| 2                                                                                                        | 179145552 | -6.03803 | 247 | 20 | Conserved              | U     |

|    |           |          |     |    |                       |   |
|----|-----------|----------|-----|----|-----------------------|---|
| 3  | 62332228  | -5.75609 | 413 | 43 | ZNF312                | U |
| 4  | 186183163 | -6.64943 | 401 | 33 | CGI                   | U |
| 4  | 41572350  | -6.30095 | 532 | 23 | CGIs                  | U |
| 4  | 81331913  | -5.61527 | 431 | 28 | PRDM8 (TF-like)       | U |
| 4  | 30326786  | -5.206   | 209 | 18 | PCDH7                 | U |
| 4  | 7046999   | -5.05616 | 257 | 26 | TBC1D14               | U |
| 5  | 43077038  | -6.40143 | 222 | 15 |                       | U |
| 5  | 42985894  | -5.24548 | 179 | 20 | AK128204              | U |
| 5  | 50294784  | -5.10193 | 295 | 38 |                       | U |
| 5  | 3242847   | -5.04118 | 339 | 72 | conserved (small CGI) | U |
| 6  | 26429366  | -6.74388 | 180 | 21 | conserved             | U |
| 6  | 85529731  | -6.28428 | 432 | 33 | conserved CGI         | U |
| 6  | 27753761  | -6.02609 | 197 | 17 | AF338194              | U |
| 6  | 27624603  | -6.0084  | 169 | 14 | ZNF184                | U |
| 6  | 28813948  | -5.9828  | 192 | 28 |                       | U |
| 6  | 27372058  | -5.61695 | 108 | 12 | POM121L2              | U |
| 6  | 41447153  | -5.19831 | 354 | 18 | CGIs                  | U |
| 6  | 29026138  | -5.16386 | 183 | 28 | ZNF311/RFP            | U |
| 7  | 35257686  | -6.76834 | 401 | 25 | CGI                   | U |
| 7  | 25869114  | -6.71694 | 376 | 55 | CGIs                  | U |
| 7  | 1239809   | -5.46049 | 541 | 43 | conserved CGI         | U |
| 7  | 4719641   | -5.19989 | 294 | 44 | KIAA0415              | U |
| 8  | 86746803  | -6.18657 | 230 | 24 | REXO1L1 CGI           | U |
| 8  | 65653959  | -6.1276  | 297 | 29 | BHLHB5                | U |
| 8  | 7626956   | -5.97521 | 476 | 92 | CGI                   | U |
| 8  | 25956147  | -5.81139 | 688 | 41 | CGI or AK130123)      | U |
| 8  | 77752823  | -5.67878 | 297 | 15 | AK131408              | U |
| 8  | 4837627   | -5.5021  | 407 | 62 | CGI                   | U |
| 8  | 238898    | -5.0736  | 268 | 54 | CGI                   | U |
| 9  | 78819662  | -6.02215 | 509 | 32 | LOC442425             | U |
| 10 | 130220474 | -5.26163 | 289 | 47 |                       | U |
| 10 | 130713891 | -5.18872 | 299 | 60 | desert                | U |
| 10 | 451381    | -5.05377 | 310 | 54 | DIP2C                 | U |
| 11 | 59075164  | -5.89087 | 201 | 15 | OSBP                  | U |
| 11 | 16585830  | -5.11717 | 502 | 29 | conserved CGI         | U |
| 12 | 25427063  | -5.1337  | 199 | 17 | CGI                   | U |
| 13 | 49595864  | -5.12471 | 584 | 31 | conserved CGI         | U |
| 14 | 20161547  | -7.47726 | 275 | 31 |                       | U |
| 14 | 85072478  | -6.94814 | 355 | 28 | FLRT2                 | U |
| 14 | 96827162  | -5.26596 | 168 | 24 | conserved uncharach   | U |
| 15 | 94704664  | -7.15825 | 725 | 70 | NR2F2                 | U |
| 15 | 94677772  | -6.33399 | 364 | 21 | NR2F2 3'              | U |
| 16 | 3170344   | -6.48124 | 398 | 39 | ZNF cluster + OR      | U |
| 16 | 3147966   | -6.19422 | 314 | 30 | in ZNF cluster        | U |
| 16 | 84198383  | -5.63491 | 514 | 49 | KIAA0182              | U |
| 16 | 6479873   | -5.32476 | 212 | 30 | A2BP1 uncharach CGI)  | U |
| 16 | 84783569  | -5.29913 | 332 | 69 |                       | U |
| 16 | 85656397  | -5.18912 | 337 | 53 |                       | U |
| 17 | 76984262  | -5.38682 | 749 | 61 |                       | U |
| 18 | 72329222  | -5.83289 | 296 | 31 | conserved             | U |
| 19 | 35410845  | -5.50012 | 348 | 29 | conserved             | U |
| 19 | 60972506  | -5.13381 | 85  | 12 | NALP11                | U |

|    |          |          |     |    |                         |   |
|----|----------|----------|-----|----|-------------------------|---|
| 20 | 21035669 | -5.20467 | 410 | 29 | C20orf19 5' (uncharach) | U |
| 20 | 9435555  | -5.06799 | 276 | 34 | C20orf103 5' uncharac   | U |
| 22 | 44837696 | -5.3486  | 423 | 44 | Uncharach               | U |
