# Supplementary material
Source: PubMed Central journal article supplement (PMC1838490)

A

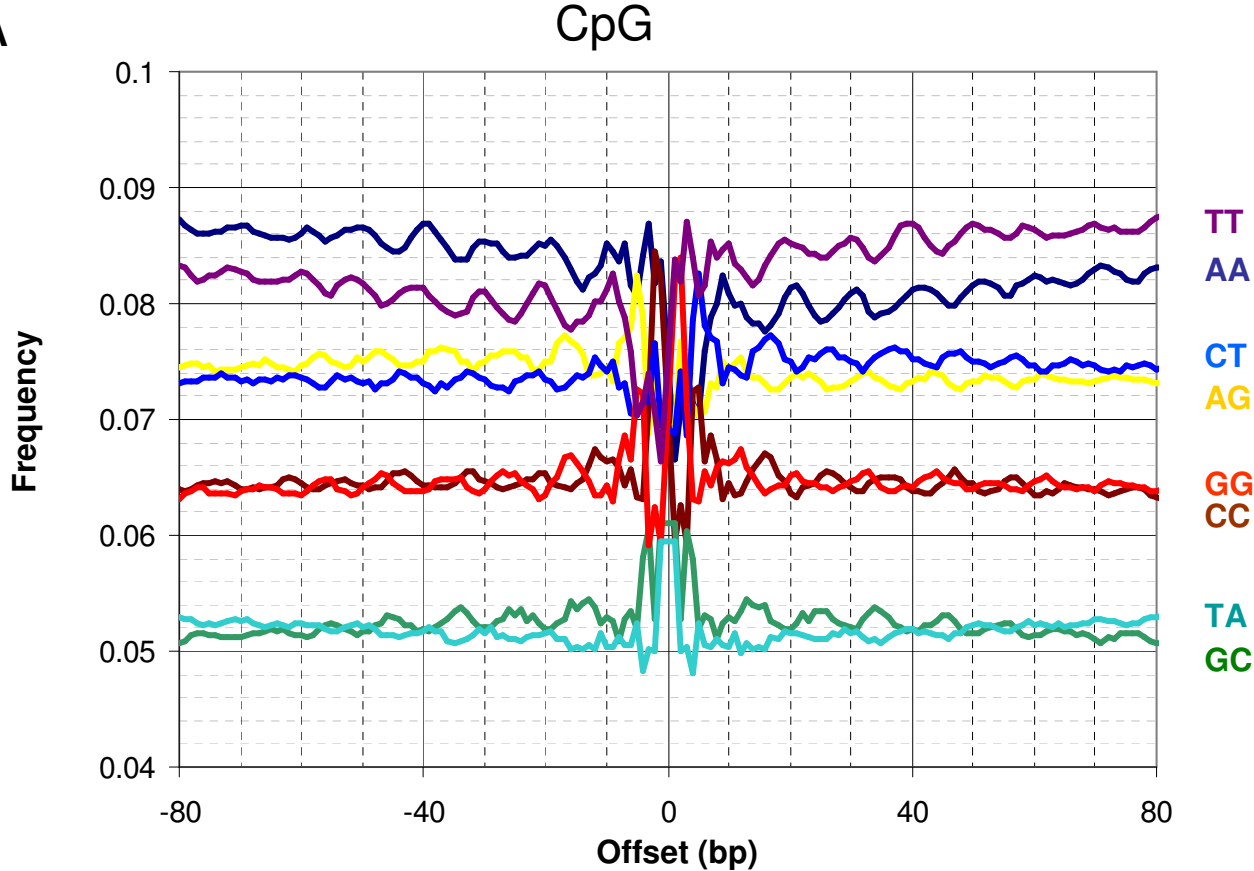

B

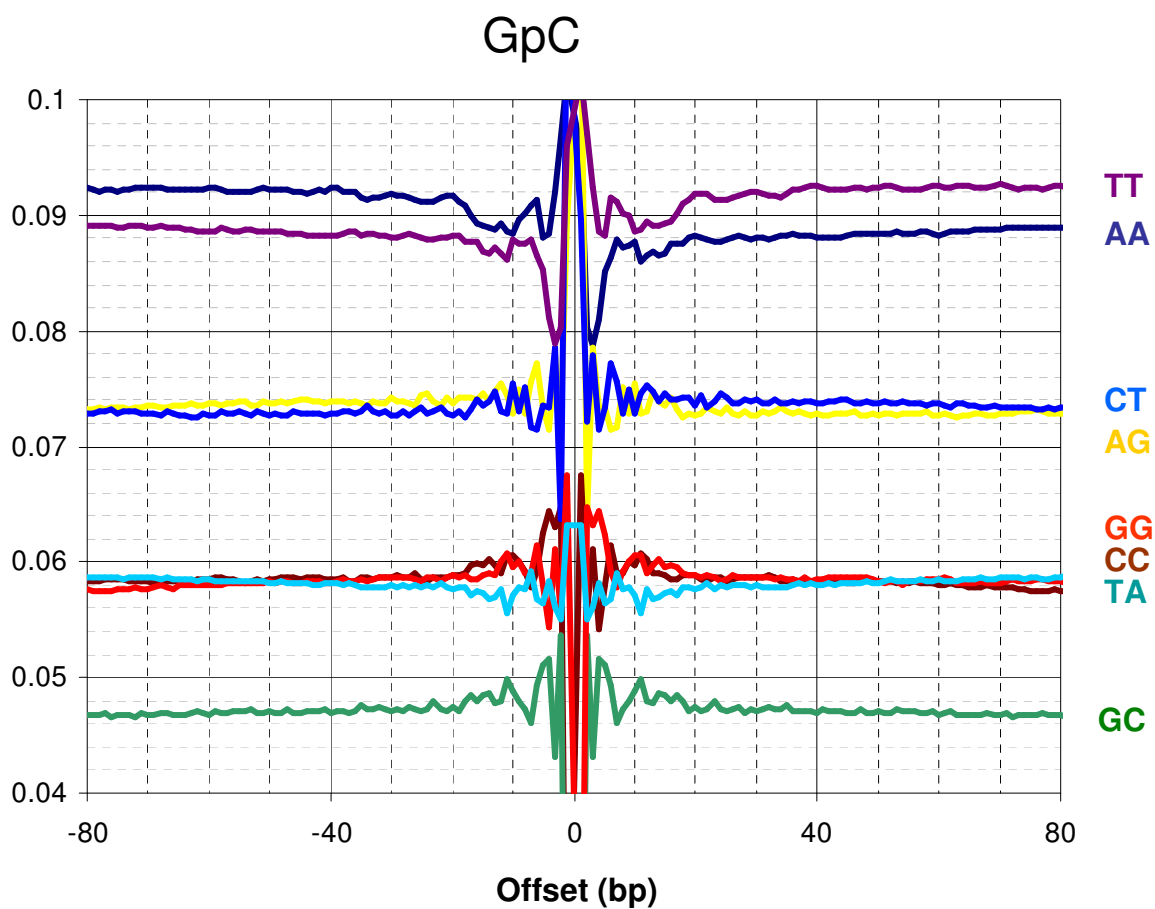

Supplement: pnas_0609746104_1.pdf [file pnas_0609746104_1.pdf]

CpGs at Suz12/hyper conserved CpG domains  
(Bins of M-score/regional mutation rate)

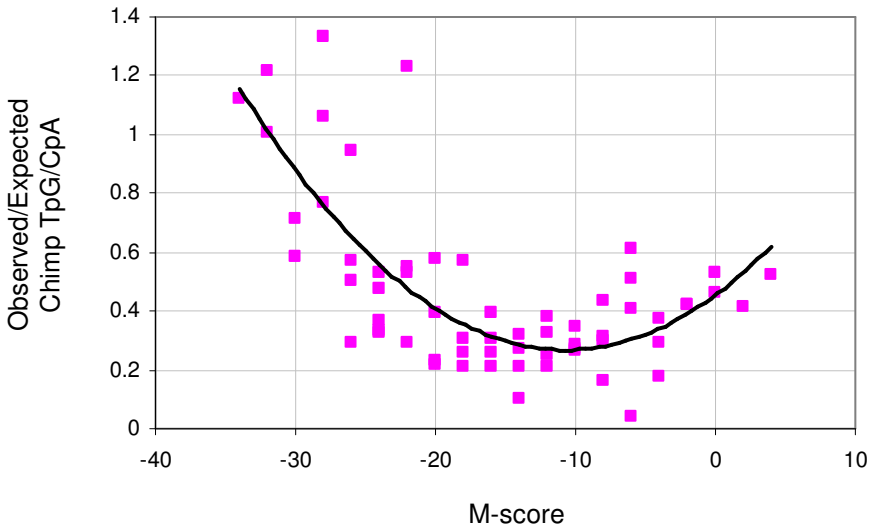

Supplement: pnas_0609746104_10.pdf [file pnas_0609746104_10.pdf]

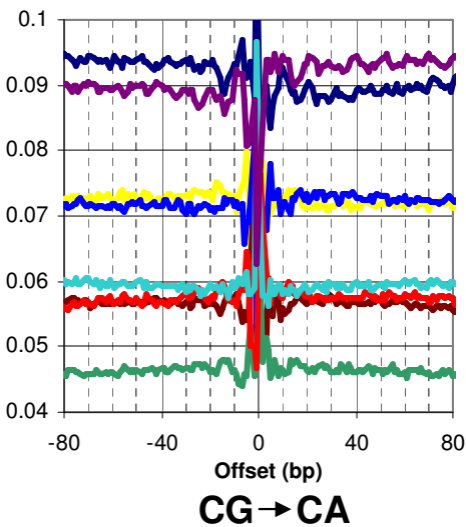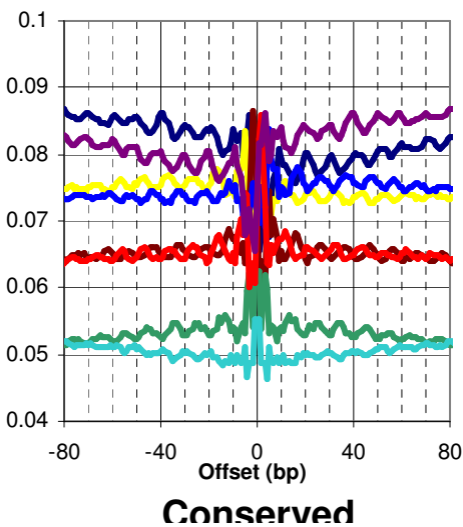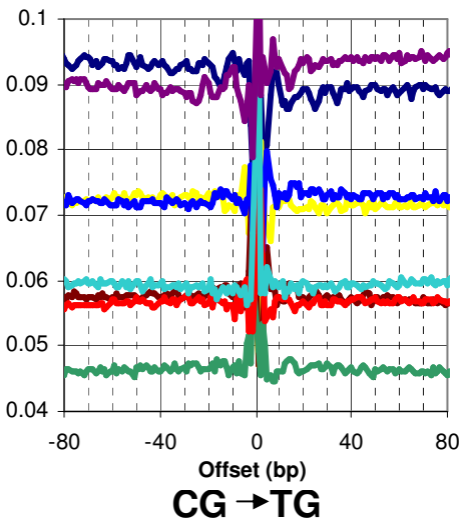

Supplement: pnas_0609746104_2.pdf [file pnas_0609746104_2.pdf]

### A flanking effect

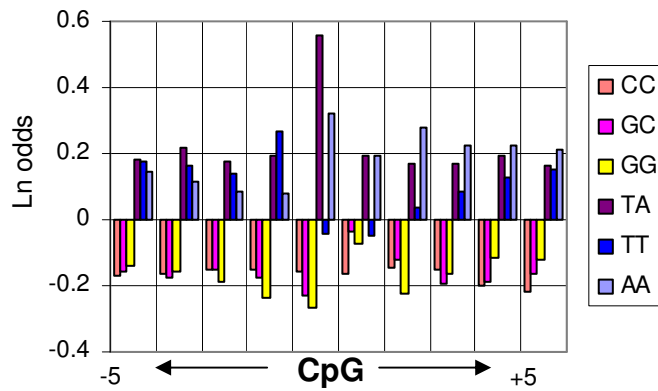

### B CpG island effect

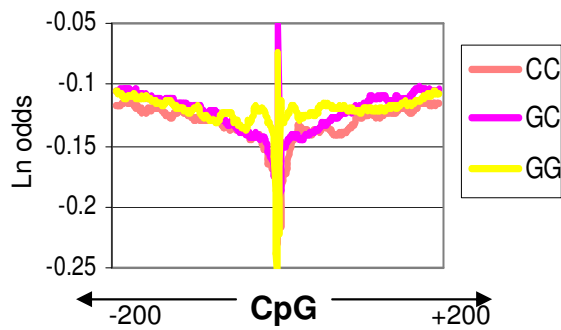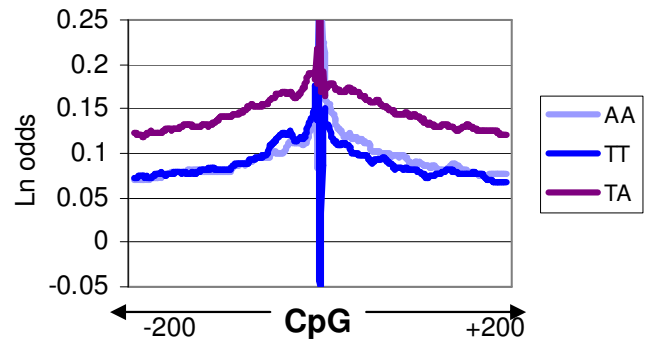

### C nucleosome effect

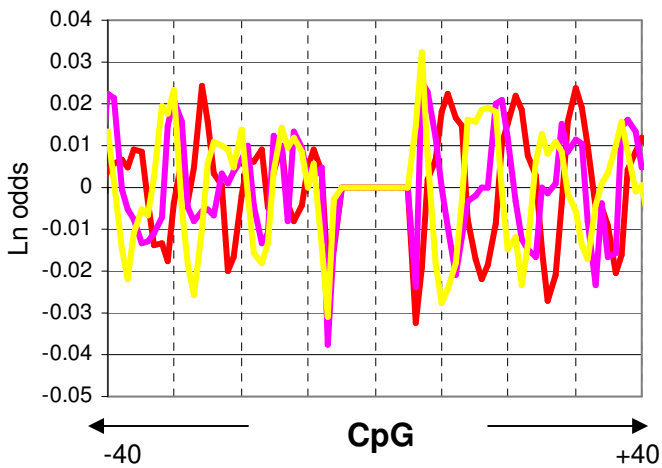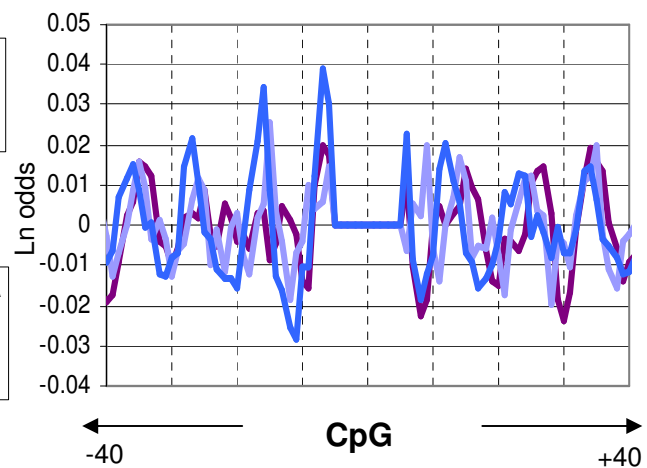

Supplement: pnas_0609746104_3.pdf [file pnas_0609746104_3.pdf]

**Fraction of CpGs**

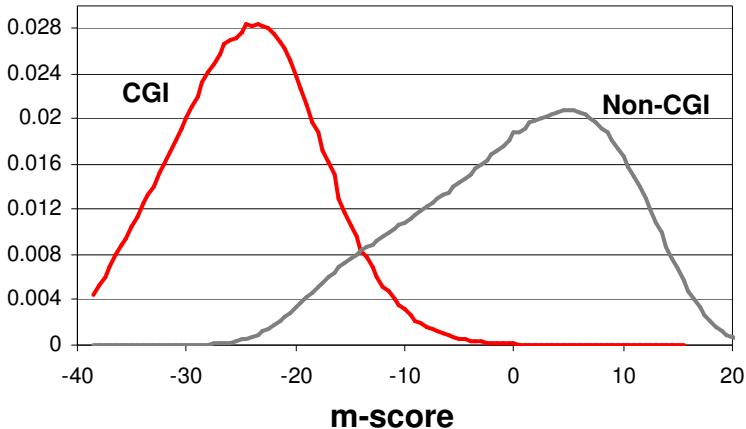

Supplement: pnas_0609746104_4.pdf [file pnas_0609746104_4.pdf]

**A**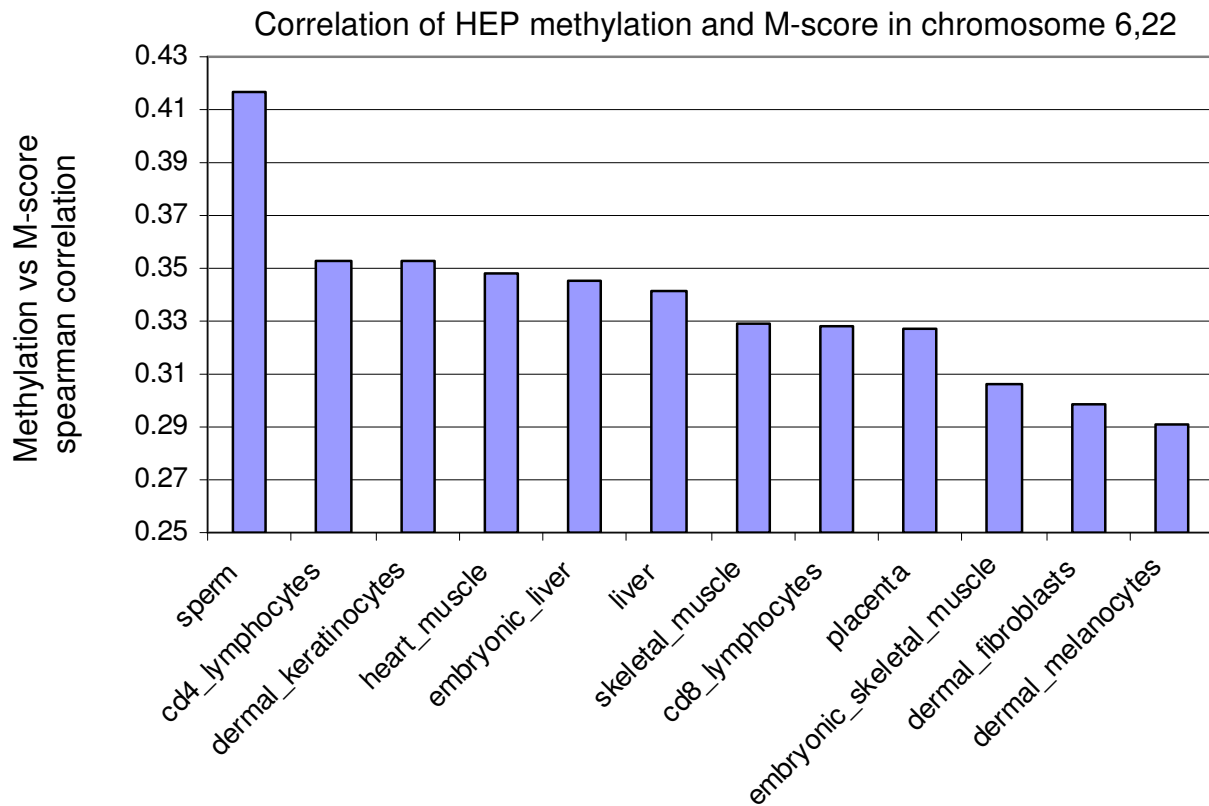**B**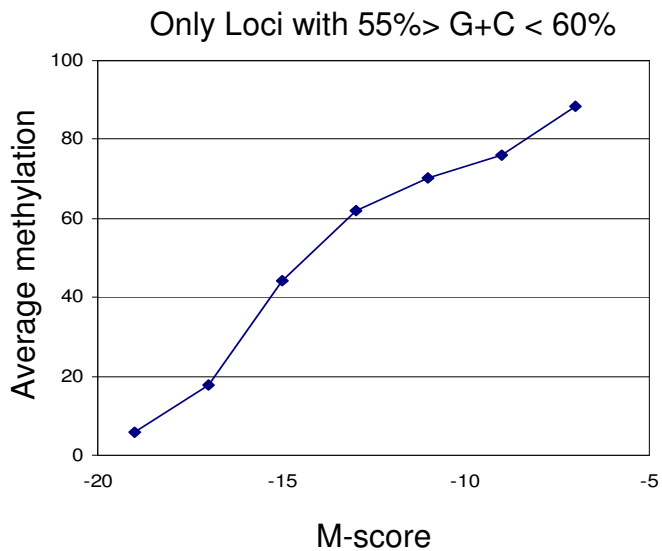**C**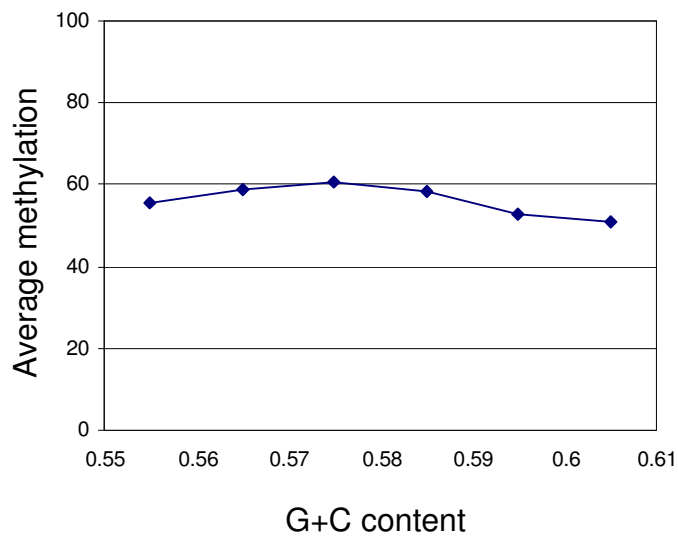

Supplement: pnas_0609746104_5.pdf [file pnas_0609746104_5.pdf]

Fraction

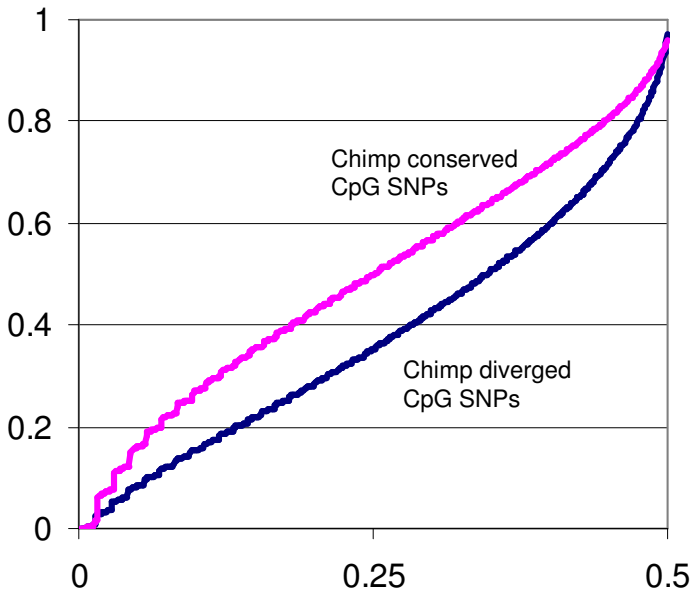

Chimp conserved  
CpG SNPs

Chimp diverged  
CpG SNPs

Average heterozygosity

Supplement: pnas_0609746104_6.pdf [file pnas_0609746104_6.pdf]

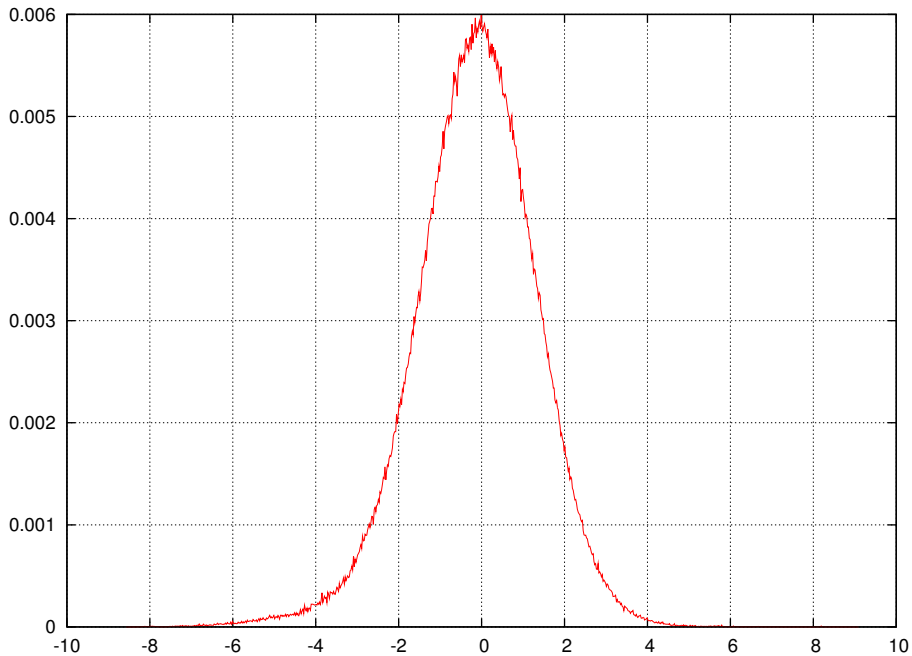

COCAD Z-score

Supplement: pnas_0609746104_7.pdf [file pnas_0609746104_7.pdf]

Frequency

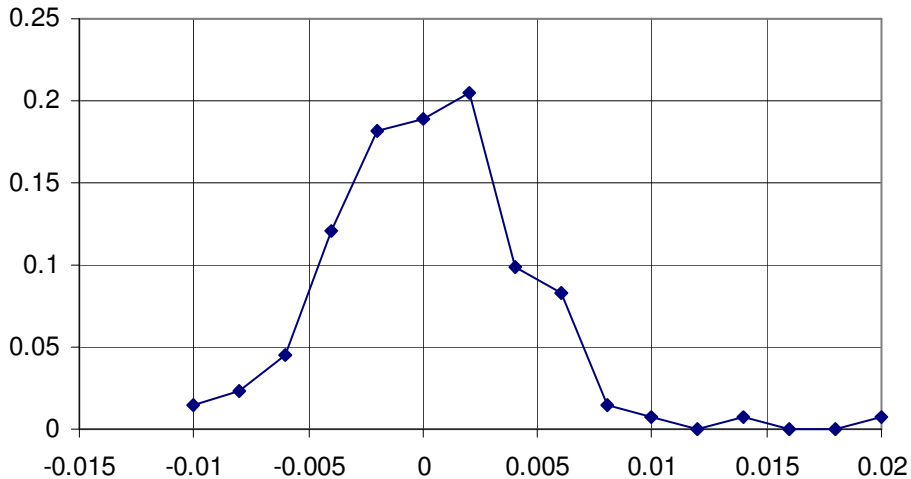

Divergence (PRC2+CCD) – divergence (flanking)

Supplement: pnas_0609746104_8.pdf [file pnas_0609746104_8.pdf]

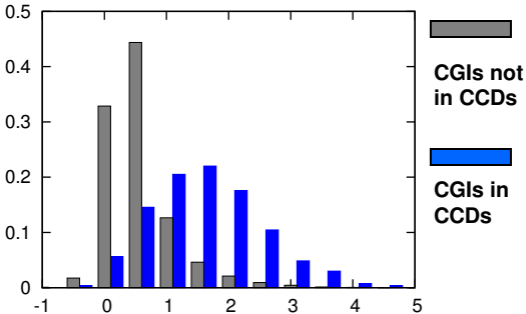

Average Suz12 ChIP in CpG Island

Supplement: pnas_0609746104_9.pdf [file pnas_0609746104_9.pdf]
